## AUTHOR CORRECTION

**Rappoport, J. Z. and Simon, S. M.** (2003). Real-time analysis of clathrin-mediated endocytosis during cell migration. *J. Cell Sci.* **116**, 847-855.

In both the online and print versions of this paper, in Materials and Methods, the construct pEGFP-dynamin2 was incorrectly identified as a human isoform. It is a rat isoform.
